# Supplementary material
Source: PubMed Central journal article supplement (PMC4410757)
Supplement: Supp_Figure1.pdf [file Supp_Figure1.pdf]

## SUPPLEMENTARY DATA

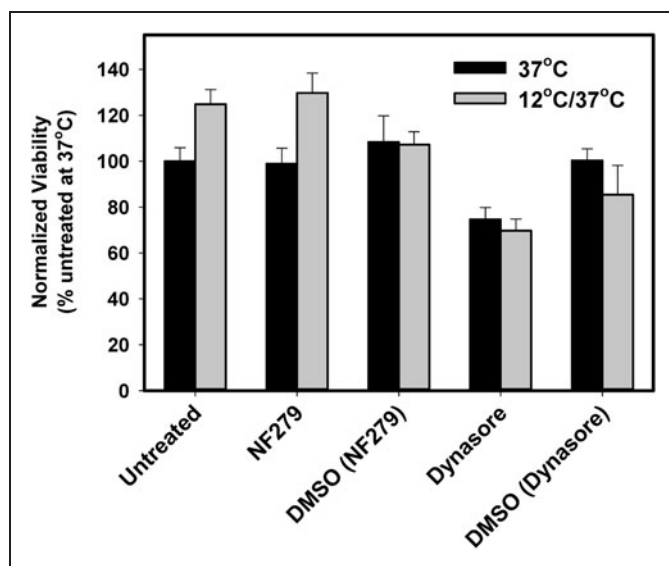

**Supplementary Fig. S1.** The effect of overnight incubation at 12°C on cell viability. Confluent TzM-bl cells grown in a 96-well plate were incubated for 90 min at 37°C in the absence or presence of 10  $\mu$ M NF279 or 400  $\mu$ M Dynasore; control wells contained respective amounts of dimethyl sulfoxide (DMSO). Cells were incubated with the MTS substrate for 1 h at 37°C, either immediately (*black bars*) or after an overnight incubation at 12°C (*gray bars*). Cell viability was measured by reading absorbance at 490 nm. The data are mean and standard deviation of four replicates.
